# Supplementary material
Source: PubMed Central journal article supplement (PMC139198)
Supplement: pnas_99_26_16648__2.pdf [file pnas_99_26_16648__2.pdf]

S.p.Dcr1 1 -----  
A.t.CAF 1 MVMEDPREATIKPSYWLDACEDISCDLIDDLVSEFDPPSSVAVNESTDENGVIINDFFGGIDHILDSIKNGGGLPNNGVSD  
M.m.Dicer 1 -----  
H.s.Dicer 1 -----  
D.m.Dicer-2 1 -----  
C.e.Dicer 1 -----

S.p.Dcr1 1 -----  
A.t.CAF 81 TNSQINEVTVTPQVIAKETVKENGLQKNGGKRDEFKSKEEGDKDRKRARVCSYQSERSNLSGRGHVNNFREGDRFMNRKRT  
M.m.Dicer 1 -----  
H.s.Dicer 1 -----  
D.m.Dicer-2 1 -----  
C.e.Dicer 1 -----

S.p.Dcr1 1 -----MDI  
A.t.CAF 161 RNWDEAGNNKKKRECNNYRRDGRDREVRGYWERDKVGSNELVYRSWTWEADHERDVKKVS GGNRECDVK EENKSKPEER  
M.m.Dicer 1 -----MNEKPCFAALS MAGLQ LMT PASS PMP PFFGLPWQQE  
H.s.Dicer 1 -----MAGLQ LMT PASS PMP PFFGLPWQQE  
D.m.Dicer-2 1 -----  
C.e.Dicer 1 -----MVRV

S.p.Dcr1 4 SSFLPQLLRKYOQDVYNIASKQNTLLVMTGAGKTLIAVKKLKKKLEQILIQSNLEHKKISVFLVNKVELVFOQAEY  
A.t.CAF 241 KEFVVEEQARRYQLDVLEQAKAKNTIAFLETGAGKTLIAILLKSVHKDLSQNR-----KMLSVFLVPKVELVYQAEV  
M.m.Dicer 37 AIHDNIYTPRKYOVELLEAALDHNTIVCLNTGSGKTFIAVLLTKELAHQIRGDLN---PHAKRTVFLVNSANQVCQVSA  
H.s.Dicer 26 AIHDNIYTPRKYOVELLEAALDHNTIVCLNTGSGKTFIAVLLTKELSYQIRGDFS---RNGKRTVFLVNSANQVACQVSA  
D.m.Dicer-2 1 MEDVEIKPRGYQLRLVDHLTKSNQIVYLPFGSGKTFVAILVLRKFSQDFDKPIE---SGKRALFMCNTEVLRQOAMA  
C.e.Dicer 5 RADLQCFNPRDYQVELLDKATKKNTIVCLNTGSGKTFIAVLLTKELVGVQLFAPLD---QGKRAFFVVEKVNLVQOAIH

S.p.Dcr1 84 IRSQIPAKVGMFYCELS--IEMSELLTNIIILKYNVIVITADLFYLFARCELSINDINLIFDECHHAIGNDAYARIMN  
A.t.CAF 316 IRNQTCFQVGHYCGEMGDFWD-SRRWREFESKQVLVMTAQILNLRHSITRMETIDLLILDECHHAIVKHPYSLVMS  
M.m.Dicer 114 VRTHSDLKVGEYSNLEVNASWT-KERWQEFKHOVLIMTCYVALTVLKNGLSLSNDINLLVFDECHLAI-IDHPYREIM  
H.s.Dicer 103 VRTHSDLKVGEYSNLEVNASWT-KERWQEFKHOVLIMTCYVALTVLKNGLSLSNDINLLVFDECHLAI-IDHPYREIM  
D.m.Dicer-2 77 VRCTNFKVGIFYVCEQGVDDWT-RGMWSDHKKNOVLVGTAVQVFLDMVQTQYVALSSLGVLVIFDECHHGT-GHHPREFEM  
C.e.Dicer 82 IEVHTSFKVGVQVHGCTSSGLWDSKQOCDFMKRHEVVVITAOCLLDLIRHAYLKEEDMCVLIIFDECHHAIGSQHPYRSIM

S.p.Dcr1 162 DFYIRAKAVLSKKHFTLPRIFGMTAS--PFTCKKG--NLYHRLYQWEQIFDSKAHVVSENEAD---YFCLP-----  
A.t.CAF 395 EFYH-----TTPKDKRPAIFGMTASPVNLKGVSSQVDCAIKIRNLETKLDSTVCTIKDRKELE---KHVMPSEIVVEY  
M.m.Dicer 192 K-----LCESCPCPRILGLTAS--ILNGKCDPEELEEKIQKLERLRSDAETAIDLVLVD---RYTSCPCPIVVD  
H.s.Dicer 181 K-----LCENCPCPRILGLTAS--ILNGKCDPEELEBEKIQKLERLRSDAETAIDLVLVD---RYTSCPCPIVVD  
D.m.Dicer-2 155 RLFT-----IANQTKLPRVVGLTGV--LIKNEIT-NVATKLELEITYRGNITVSDTKEMENVMLYAKPTEVLVVSF  
C.e.Dicer 162 VDYK-----LLKKDKPVPRVLGLTAS--LIKAKVAPEKLEMLKLESANSDSVIETASDLVLSL---KYGAKPYEVVITIC

S.p.Dcr1 227 -----EESYVMYSNKLVPSPD-----SILKKCEETLOGKLTISRAVKTALAETHDMG  
A.t.CAF 466 DKAATMWSLHETIKOMTAAVEEAQASSRSKQVFMGARDAGAKDELROVYGVSERTESDGAANLTHKLRAINYTFAEELG  
M.m.Dicer 259 GPETD---RSGLYERLLMEEAALDFIND-----CNVAVYSKERDSTLSKQILSDCRAVLVVLG  
H.s.Dicer 248 GPETD---RSGLYERLLMEEAALDFIND-----CNVAVYSKERDSTLSKQILSDCRAVLVVLG  
D.m.Dicer-2 226 PHQEQVLTVIRLISAEIEKFYVSLDLMNFVQPIRR---SKSLQCLRDPSSKKSFKQLFNFPLYQMKKEYG  
C.e.Dicer 232 KDEIGCLGIPNFTVIEIFDETFVAVNT-----HTEFHDDLDPRRPKDSDLTTRAVFRQLG

S.p.Dcr1 275 LWFGEQVWLYLVDFVETKRLKKA--LGLQSDDEELADRLKIFVDEWK-----NNKYSNDNGPRVPEVDSTVVT  
A.t.CAF 546 QWCAYKVCQSFLSALQSDEEVNFQVDVKFOESYLSVVSLQCELEEGAAAEKVAEAVGKPENGNAHDEVEEGELPDDPV  
M.m.Dicer 316 PWCADKVAQMMVRELQKYIKHEQE-ELHRKFLFLFDTLRKRITAHCEEFSPASLDLKVYTPKVMKLEELRKYKPYERQ  
H.s.Dicer 305 PWCADKVAQMMVRELQKYIKHEQE-ELHRKFLFLFDTLRKRITAHCEEFSPASLDLKVYTPKVMKLEELRKYKPYERQ  
D.m.Dicer-2 293 IMAASIAIISLIVFEDIKREQAETLSVRLMHRALTLCERIRHLLVOKLQDMTYD---DDDNVNTTEVIMNFTPKVQ  
C.e.Dicer 292 PWAAWRTAQWKEKELGKILKSQVLPDKTLEFLINMAKTSMTITKRLLEP-----EMKKKLSIEALRPPYVQRVI

S.p.Dcr1 343 DKVEKLELLKATYRKSDS-----VRTVIFVERKATAFTLS-LFMKTLN-----  
A.t.CAF 626 VSGGFHVDEVIGAAVADGKVTPKVQS-----LIKLLKYOHTADRAIVVERVVAALVLPKVFALPS  
M.m.Dicer 395 --QFESVWYNNRNDNYVSWSDSEDDDDDEEIEEKEKPETNFSPFTNLCCGIFVERRYTAVVLN-RLKKEAGKQDPE  
H.s.Dicer 384 --QFESVWYNNRNDNYVSWSDSEDDDEDEEIEEKEKPETNFSPFTNLCCGIFVERRYTAVVLN-RLKKEAGKQDPE  
D.m.Dicer-2 369 RFTMSLKVSEADKDF-----KDTCCLVFVERRYTCCKYGLLNYIQSTPEL  
C.e.Dicer 360 R-LFELLTFENPEFCKERMKLEKAEH-----LSAIFVDRVYTAYSLL-LMMRHKISWEPK

S.p.Dcr1 386 LPNIRAHSEIIGHGP----SDQGFMSMTRRQKDTLHKFTGKYNLIATAVAEEGIDVPSCNLVIRFNICRTVTOVYQSR  
A.t.CAF 690 LSEFIRCASMI GHNN-----SQEMKSSQMDTISKFRDGHVTLVATSVAEEGLDIRQCNVVRFDLAKTVLAVYQSR  
M.m.Dicer 472 LAYISSNFTTGHGIGKNPRSKQMAEAFRQOEVLRLKFRAHETNLLIATSVEEGVDIPKCNLVVRFDLTEYRSYVQSK  
H.s.Dicer 461 LAYISSNFTTGHGIGKNPRNKQMAEAFRQOEVLRLKFRAHETNLLIATSVEEGVDIPKCNLVVRFDLTEYRSYVQSK

D.m.Dicer-2 416 RNVLTPTQFMVGRNN---ISPDFESVLERKWKOKSAIQQFRDGNANLMICSSVLEEGIDVQACNHVFILDPVKTFTNMYVQSK  
C.e.Dicer 414 FKFNVPDYVVGASG--RNLASSDSQGLHKRQTEVLRFRFRNEINCLAIATSVLEEGVDVKQCNLVIKFDRELDMRSYVQSK

S.p.Dcr1 462 GRARA-----  
A.t.CAF 762 GRARKPGSDYILMVERGN-VSHAAFILRNARNSEETLRKEAIERTLSHLKDTSRILSIDAVEGTVYKVEATGAMVSLNSA  
M.m.Dicer 552 GRARAPISNYVMLADTDKIKSFEEEDLKYKAIEKILRNKCSKSDAGAEADVHAGVDEDAFPPYVLRPDDGGPRVINTA  
H.s.Dicer 541 GRARAPISNYVMLADTDKIKSFEEEDLKYKAIEKILRNKCSKSDVDTGETDIDPVVDDDDVFPPYVLRPDDGGPRVINTA  
D.m.Dicer-2 493 GRARTTEAKRFVLFADTKEREKTIQQIYQYRKAHNDIAEYLKDRVLEKTEPELYEIKG-HFQDDIDPFTNENCAVLLPNNNA  
C.e.Dicer 492 GRARR-----AGSRVYVITVE

S.p.Dcr1 467 -----M A S K F L I F L N -----E E L L I H E R I L H E E K N L K F A L S E L S N S N I F D S L V C E  
A.t.CAF 841 VGLVHFYCSQLPGDRYAILRPEFSMEKHKPG-----GHTEYSCLQLPCNAFFETLEGVCSMSRLAQAVCLAAC  
M.m.Dicer 632 IGHINRYCARLPSDFETHLAPKCRTRELPDG-----TFYSTLYLPINSPLRASIVGP-PMDSVRLAERVVALICC  
H.s.Dicer 621 IGHINRYCARLPSDFETHLAPKCRTRELPDG-----TFYSTLYLPINSPLRASIVGP-PMSQVRLAERVVALICC  
D.m.Dicer-2 572 LATLHRYCQTIPIDAFGFVLPWFHVLQEDERDRIFGVSAKGGHVISINMPVNCMLRDTIYSD-PMDNVRLAKTISAFFKAC  
C.e.Dicer 507 EKDTAAAYCSKLPSDIFTRIVPHNQIPIEBNG-----VTKYCAELLLPINSPIKHAIVLKNMMPNKKTAQMAVALEAC

S.p.Dcr1 513 EREAVTDIVYEVGET-CALLTG-----LYAVS  
A.t.CAF 913 KKLHEMCAFTDMLLPDKGSGQDA-----EKADQDDECEPVPCTARHREFYEGVAVLKGEMVSSSGKEVCESSKL  
M.m.Dicer 701 EKLHIGELDEHLPV-GKETVK--YEELDLHDEEETSVPGRP--GSTKRRQCPKAIPTCLRDSYPRPQPCYLYVIG  
H.s.Dicer 690 EKLHIGELDDHLPV-GKETVK--YEELDLHDEEETSVPGRP--GSTKRRQCPKAIPTCLRDSYPRPQPCYLYVIG  
D.m.Dicer-2 651 KVIYSLGELNERFVPKTKERVASIADVHFEHWNKYGDSVTATVNKADKSKDRTYKTECLEFYDALPRVGEICAYEYIF  
C.e.Dicer 580 RQLHLEGELEDDNLLPK-GRESIAKLLHIDDEPDEYAPGIAAKV--GSSKRRKQLYDKKLARALNSESVEADKCEFYAFE

S.p.Dcr1 540 LLYNFCNTLSRDVYTR-YEFTFTAQPCLSG-----  
A.t.CAF 983 FHYMHNVRCVDFGSSKDPFLSEVS-----  
M.m.Dicer 776 MVLTTPLPDELNFRRRKLYPPEDTTRCFGLITAKPIPIQIPHFPVYTRSGEVTISIELKKSGLFSLQMLELITRLHOYIF  
H.s.Dicer 765 MVLTTPLPDELNFRRRKLYPPEDTTRCFGLITAKPIPIQIPHFPVYTRSGEVTISIELKKSGLFSLQMLELITRLHOYIF  
D.m.Dicer-2 731 LEPQFESCHYTEHMYLNLQTPRNYAILLRNKLPLAEMPLFSNQGKLHVVRAN---APLEVIITQNSEQLLELHQFHGMVF  
C.e.Dicer 657 LERFREAEALTLPKRRKFEDFPNVEYCFGLSAKELPKT-----TVTAAQLQELHQLFHNYLE

S.p.Dcr1 569 -----WYCFEVELPKACKVPAQOSPCKSTRKAKQNAAFIMGLDLIRMGIT  
A.t.CAF 1008 -----FAILFGNELDAEVLMSMDLYVARAMITKASLAFKGSLDITENQLS  
M.m.Dicer 856 SHILRLEKP-ALEEKPTG-AESAYCVLPLNVVNDSSGLTLDIDFKFEMEDIEKSEARIGIPSTKYSKTFPFFVKLEDYQDAVI  
H.s.Dicer 845 SHILRLEKP-ALEEKPTD-ADSAYCVLPLNVVNDSSGLTLDIDFKFEMEDIEKSEARIGIPSTKYSKTFPFFVKLEDYQDAVI  
D.m.Dicer-2 808 RDILKIWEF--FVLDRRSKENSYLVPPLIIGAGEQKCEDWELMTNFRLLPQSHGSNVQOREQQP--APLPEDEEGKIV  
C.e.Dicer 714 IQVLMQCKTGNLEEDGTSNAPLNTLLVPLNKRKDDMSYTNMKYVSEVANMENLPR-LPKDEVRRQYKFNEDYKDAIV

S.p.Dcr1 615 DKLLKPLDFRRKIADLETLEDELKDEG-YIETERYVPKSWMKVPEDTTRCFVSLIYTDANEGDNHIFHPLVVFQAHSF  
A.t.CAF 1055 LKIKFHVLRMSIVLDVDFPSTPWPDPKAYLFPVPTDNTSMEPKIGINWELVEKTKTKTAWDNPQRARPDVYLTGNER  
M.m.Dicer 934 LPRYRNFQOPHRFYVADVYTDLTPLSKF-ESPEYETFAEYKTKYNLDDLNLNQLPDDVDHTSSRLNLLTPRHLNOKGKA  
H.s.Dicer 923 LPRYRNFQOPHRFYVADVYTDLTPLSKF-ESPEYETFAEYKTKYNLDDLNLNQLPDDVDHTSSRLNLLTPRHLNOKGKA  
D.m.Dicer-2 883 TQWYANYDKF--MLVTKVHRELTPLSYMEKNQQDKTYEETMSKYGNRTG---DVVHKQKFMIEVRDLTECLTFYVHNR  
C.e.Dicer 793 MFWYRNLEQPFVYVVAELPEWRPSSKF-EDTHPETFNEYFKKYYKLEIYDQNCQLDLDVDFTSIRLNLLOPRIQNPFRS

S.p.Dcr1 694 PKLDSFILN-----STVGERVKIVLETIEDSPKIDSHLELHKKSTRYLQFGIISTSEEQOI  
A.t.CAF 1135 TLGGDRREYGF-----KLRHNIYFCQKSHETYGIRGAVASFDVVRASGLLEVRFAFEKEWEEDL  
M.m.Dicer 1013 LPLSSAEKRAKWEQLQN-----KQILVPELCAIHPIPASLWRKAVCLPSILYRLHCLLTAABELRAQTASDA  
H.s.Dicer 1002 LPLSSAEKRAKWEQLQN-----KQILVPELCAIHPIPASLWRKAVCLPSILYRLHCLLTAABELRAQTASDA  
D.m.Dicer-2 957 GKFNKSKAKMK-----VILPELGFNFNEGDLWIKLFLPSILNRMYLELHAEALRKRENTYL  
C.e.Dicer 872 RTVNSNSTSNIPQASASDSKESNTSVPHSSQRQILVPELMDIHPISATLWNVIAALPSIFRVNOLLTDELRETILVKA

S.p.Dcr1 751 P-----  
A.t.CAF 1195 S-----  
M.m.Dicer 1080 G-VGVRSLPVDFRPNLDFGWKKSIDSKSFISTCNSSLAESDNYCKHSTTVVPEHAAHQGATRP-SLENHQMSVNCRL  
H.s.Dicer 1069 G-VGVRSLPADFRPNLDFGWKKSIDSKSFISISNSSSAENDNYCKHS-TIVPENAAHQGANRTSSLENHQMSVNCRTL  
D.m.Dicer-2 1017 N-----  
C.e.Dicer 952 FGKEKTKLDDNVEVNSLAVATEYEKQTIIVKKIQLRDLNOKSIEDQERETRENDKIDDGEELFNIGVWPEEAVRIGV

S.p.Dcr1 752 -----TPYWLAPLNLSTCYRLENLFDVDTIQNFFLPEPVQNVTDLQSDTVLLVNPQS-----  
A.t.CAF 1196 -----KGLKLMADGCMVAEDLKGKIVTAAHSKGRFYVDSICYDMSAETSFPKRGYLGPLEY  
M.m.Dicer 1158 PAKSPAKLQSEVSTDLTAINGLSYNKNLANGSYDIVNRDFCQGNQNLNYKQEIIPVQPTTSYPIQNLNLYENQPKBSNECP  
H.s.Dicer 1147 LSPSPGKLVHEVSADLTAINGLSYNQNLANGSYDLANRDFCQGNQNLNYKQEIIPVQPTTSYPIQNLNLYENQPKBSNECP  
D.m.Dicer-2 1018 -----LHLLPFGNTDYMPPPLEIDYSLKRNVDPLGNVPTEDIIEPKSLEPMPKTSIEASVA  
C.e.Dicer 1032 EISSRDRDRMGEDQDITVGLTQGLDGNISDEDDLIPFVMDHYTARLTSNRNGIGAWSGSESIVPQCGWDWGPEDNSPM

S.p.Dcr1 807 IYEYAFEGFVNSEFMIPAKKKDKRPSALCKKPLRLNYSIWGNRAKSIIPKSQQR-----  
A.t.CAF 1253 NTYADYKQKYGVDLNCQKQPLKRGVSYCKNLSPRFEQSGESETVLDKTYVFLP-----  
M.m.Dicer 1238 ILSNTYLDG--NANTSTSDGSPAISTMPAMNAVKALKDRMDSEQSPSVGYSSRRLGPNPGLILQALTLNSASDG-FNIE  
H.s.Dicer 1227 ILSNKYLDG--NANKSTSDGSPVAVMVPCTDITQVLKGRMDSEQSPSVGYSSRRLGPNPGLILQALTLNSASDG-FNIE  
D.m.Dicer-2 1076 NLEITEFEN-----PWQKYMEFVDLSRNLLSITYPVELDYYYHFSVGNVCEFN-----  
C.e.Dicer 1112 PFQILGGPGLNVQALMAIVGRVFDPESTASSLSQIVQESTVSPPKQLTRKEEQFKKLQNDLILKQAKERLEALEMSEDEME

S.p.Dcr1 863 -----SFYINLNYLPLPWSRHLKNSALLIPSIHYHIENLLVASSFIEHFR--  
A.t.CAF 1311 -----PDLGVHPLSGSLIRGAQRLPSIMRRVESMLLAVQLKLLISYP  
M.m.Dicer 1315 RLEMLGDSFLKHAITTYLFCTYPAHEGRLSYMRSKKVSNCNLYRLGKKKGLPSRMVVSIFDPPVNWLPFGYVNVQDKSN  
H.s.Dicer 1304 RLEMLGDSFLKHAITTYLFCTYPAHEGRLSYMRSKKVSNCNLYRLGKKKGLPSRMVVSIFDPPVNWLPFGYVNVQDKSN  
D.m.Dicer-2 1123 -----EMDFEKEYIAKNQFHMPTGNLYGNRTPAKTNANVPALMPSKPTVR  
C.e.Dicer 1192 KPRRLIEDVFNLEDYGDQENQEDNTPTNFPKTIDEEIEELSLTGARKQELIDDNAAKTDVLERENCEVLP--VAINEKSR

S.p.Dcr1 907 -----LDCKIDTA-----COALTSAESQLNFDYDRLEFYGDCTFLKLGASITVFLKFPD  
A.t.CAF 1354 IPTSK-----ILEALTAASCOETFCYERAEILGDAYLKWVVSRELFLLKYPQ  
M.m.Dicer 1395 SEKWEKDEMTKDCMLLANGKLGFACEE-----EDLTWRAPKBEAEDEDFLEFYDQEHQFIDSLMLGSGAFV  
H.s.Dicer 1384 TDKWEKDEMTKDCMLLANGKLGDEDEEEDDEE-----ESLWRAPKBEADYEDFLEFYDQEHRFIDNMLGSGAFV  
D.m.Dicer-2 1169 GKVKPLLIQKTVSKEHITPAEQGE-----FLAATASSAADVFDMERLEILGDSFLKLSATFLYASKYS  
C.e.Dicer 1270 SFSSEKESKAINGRILIRQISEEYVSHIDSDIGLVSPCLLLTALTITSNAAAGMSLERFETIGDSFLKLFATIDYLYHTLLD

S.p.Dcr1 955 TQEQYLHFNRRKKIISNCLYKVAIDCELPKYALSTPLFIR-HWCOPYGFOKS-----TS  
A.t.CAF 1400 KHEGQLTRMRQOIVSNMVLVQFALVKGLOSYIQADRFAFS-RWSAAGVPPVFD-----ED  
M.m.Dicer 1462 RKISLSPFASDSAYEWMFKKASLGSMPFASGLDFDFYS-SWDAMCYLDFSKAVEEDDFVVGFWNPSEENCGVDTCKQS  
H.s.Dicer 1455 KKISLSPFSTIDSAYEWMFKKASLGSMPFSSDFDFDFYS-SWDAMCYLDFSKAVEEDDFVVGFWNPSEENCGVDTCKQS  
D.m.Dicer-2 1235 WNECTLTEVRSKLVSNRNLLFCLIDADIPTKLNITIQFTPRYIWLPPGISLPHN-----VLALWQENPEFAKIGIHHNL  
C.e.Dicer 1350 QHEGKLSFARSKFVSNCLYRLGKLLGIEQLIVANKFDAHDSWLPPECYIPTCDFKAPN--TDDAEKEDNERILLDGQVI

S.p.Dcr1 1007 DKCRYAVLQKISVKRIADMVEASIGACILDSG---LDSALKICKSLSVGLLDISNWDENWNYFDIN-----  
A.t.CAF 1454 TKDGGSSFDEEQKPVSEENSDFEDGEMEDGE---LEGDLSYRVLSSKTLADVVEALIGVYVEGCKI AANHLMKWIG  
M.m.Dicer 1541 ISYDLHTEQCIADKSIADQVEALIGCYLTSCG---ERAAQLFCISLGLKVLPIKRTSREKALDPAQENSSQOKSLSG  
H.s.Dicer 1534 ISYDLHTEQCIADKSIADQVEALIGCYLTSCG---ERAAQLFCISLGLKVLPIKRTDREKALCPTRENFNSQOKNLSV  
D.m.Dicer-2 1308 RDLALGDEESLIVKGNCSIDINYRNFVEGCRANQSFYAGAFSSEVNFVGLVTLINKVIADTLEALGLVIVKNYGLQHAF  
C.e.Dicer 1428 EEKFNKGTWDIGGDVSKSTTDCGETITFPKQ---ARVGNDDISELPYNLLTQQHISDSIADAVEALIVHLLTLGPN

S.p.Dcr1 1070 -----TYADSLRNQVFPYS-----SYTEETIGYSFKNKKLHLAFIHPMSMS  
A.t.CAF 1531 IHVED-----DPDEVGHLKNNVPESVLKSIDFVGLERALKYEFKRLKLLVEAITHASRPS  
M.m.Dicer 1617 SCAAP--VGRSSAGKDEYGCLEKTPPROMFDHPDAEKLNLHLIS----GFETFEKKINRFRKNKAYLLOAFTHASYHY  
H.s.Dicer 1610 SCAAASVASSRSVLDSEYGCLEKTPPROMFDHPDADKTLNLHLIS----GFENEKKNINRFRKNKAYLLOAFTHASYHY  
D.m.Dicer-2 1388 KMIEYFKICRADIDKPLTQLLNLELGGKRRANVNTTEIDGFLIN-----HYYLEKNLGYTFKDRRYLLOALTHEPSYPT  
C.e.Dicer 1504 PTKVMNWMGLKVIQKDKSDVPSLLRFIDTPPNPNAISLNLNLLWQQFOFTOLEEKIGYRFBKRAYLLOAFTHASYIN

S.p.Dcr1 1112 QQCYENYQQLLEFLGDAVLDYITVQYLYKKYPNAISGELTDYKSEYVQNKSLSYIGFVLNLHKYIQHESAMCDAITFEYQ  
A.t.CAF 1588 S--GVSCYORLEFVGDAVLDHLITRHLLEFTYTSLEPGRITDLRAAANNENFARVAVKHKLHLVLRHGSSEALEKQIREFV  
M.m.Dicer 1690 N-TTDCYORLEFLGDAVLDYLIITHLLEDPQHSFPGVLTDLRSALVNNITFASLAVKYDYHKYFMAVSEPLFHVIDDFV  
H.s.Dicer 1685 N-TTDCYORLEFLGDAVLDYLIITHLLEDPQHSFPGVLTDLRSALVNNITFASLAVKYDYHKYFMAVSEPLFHVIDDFV  
D.m.Dicer-2 1462 N-RTTGSYQLEFLGDAVLDLISAYIENNTKMPGALDRLSALVNNITLACICVRRHLHFILANAKLSEITISKFV  
C.e.Dicer 1584 N-RVITGCYORLEFLGDAVLDYMITRYLLEDSRQYSEGVLTDLRSALVNNITFASLAVKVEFOKHTFAMCPGLYHMIKFKV

S.p.Dcr1 1192 ELIEAFRETAS-----ENPWFWE-----TSPKFTSDTLEAMI  
A.t.CAF 1666 KEVQTESSKPG-----FNSEFISG-----DCKAPKVLGDIYESIA  
M.m.Dicer 1769 KFOLEKNEMQG-----MDESLRRS-----EEDKEEEDIEVPKAMGDIFESLA  
H.s.Dicer 1764 QFOLEKNEMQG-----MDESLRRS-----EEDKEEEDIEVPKAMGDIFESLA  
D.m.Dicer-2 1541 NFOESQGHVNTNYRILLEEADVQTPPDLDDELDMTELPHANKCISQEAEGVPPKGFESMSTNVDVPKAGDVTLEALI  
C.e.Dicer 1663 KLCSENFDTN-----FNAEYLVTT-----EEDIEGQEEEDIEVPKAMGDIFESVA

S.p.Dcr1 1226 CAIFLDSGFSLOSLQFVLPFLNLSIGDATHKAKGDIEKRYOILKQDGC-----EDFCTKCVIEVKSSSHKTLEN--  
A.t.CAF 1700 GAIPLDSGKDTTAAKVFQPLLOPMVTP--ETIPMHVPVLEQERCQQAEGLYKASRSNTATVVFIDGVCQVQAQNP  
M.m.Dicer 1812 GAIYMDSGMSLEVVWQVYVPMMPPLIEKFSANVPRSPVRELEMEPET-----AKFSPAERTYDG-KVRVT--  
H.s.Dicer 1807 GAIYMDSGMSLEVVWQVYVPMMPPLIEKFSANVPRSPVRELEMEPET-----AKFSPAERTYDG-KVRVT--  
D.m.Dicer-2 1621 AAAYLDCR-DLQRTWEVILNLFEELEOEFTRKVPINHTROLVEHKHAKP-----VFGSFTVEGCTVMVS--  
C.e.Dicer 1710 GAIYLDSCRNLDITWQVIHMMRGTIELCCANPPRSPIRELMETFQSK-----VFFSKMERILESGKVRVT--

S.p.Dcr1 1297 -----TELHLTKYIGFSFFRHGNIVAYGKSRKVANARYIMKORLLKLEEDKSNLLYSNCNCKFSKK  
A.t.CAF 1778 QKKMAQKLAARNALAAALKEKEIAESKEKHINNGNAGEDQGENENGNKKNCHQPFTRQTLNDICLRKNWPMPSYRCVKEGG

|             |      |                                                             |
|-------------|------|-------------------------------------------------------------|
| M.m.Dicer   | 1877 | -----VEVVGKGF-----KVGRSYRIAKSAAARRALRSISKANQFQVPNS-----     |
| H.s.Dicer   | 1872 | -----VEVVGKGF-----KVGRSYRIAKSAAARRALRSISKANQFQVPNS-----     |
| D.m.Dicer-2 | 1684 | -----COFTCMEKT-----IKVYGFSSNKDQAKLSAAKHALQQLSKCDA-----      |
| C.e.Dicer   | 1776 | -----VEVVNMRFE-----TGMGRNYRIAKATAAKRALKYLHQIECQRRCSPSLTTV-- |
| S.p.Dcr1    | 1358 | KPSDEQIKGDGKVKSLT-----                                      |
| A.t.CAF     | 1858 | PAHAKRFTFGVVRVNTSDRGWTDECIGEPMPVSVKKAKDSAAVLLLELLNKTFS      |
| M.m.Dicer   |      | -----                                                       |
| H.s.Dicer   |      | -----                                                       |
| D.m.Dicer-2 |      | -----                                                       |
| C.e.Dicer   |      | -----                                                       |
